# Supplementary figures and images for: 6-Lead Electrocardiography is a Viable Option for Identification of Rhythm and Conduction Anomalies of Patients in the Telemedicine-Based, Hospital-at-Home Setting. A Prospective Validation Study
Source: Preprints.org preprint supplement (doi:10.20944/preprints202308.1766.v1), 2023-08-28

Supplementary figure 1. **Illustration of use the 6-Lead Kardiamobile device**


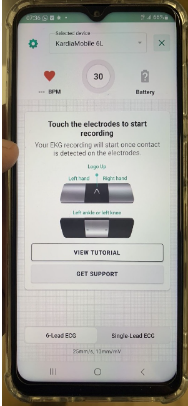

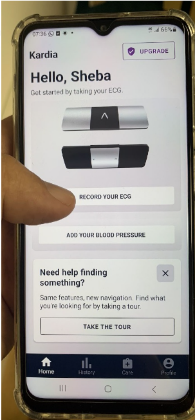

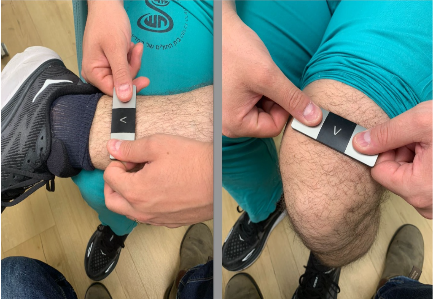

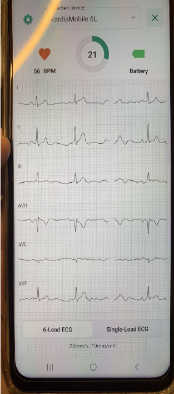

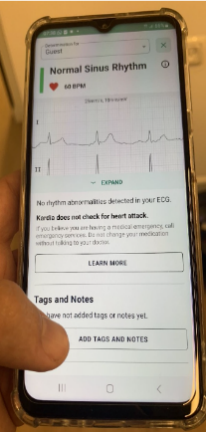

Supplement: Supplementary file 2 [file supplementary]
